# Supplementary material
Source: PubMed Central journal article supplement (PMC11385663)
Supplement: PBI-19-1624-s013.pdf [file PBI-19-1624-s013.pdf]

## Supplemental Table

| Genus Species              |                                             | <i>Triticum monococcum</i> | <i>Aegilops speltoides</i> | <i>Aegilops tauschii</i> | <i>Triticum turgidum</i> |               | <i>Triticum aestivum</i> |           |
|----------------------------|---------------------------------------------|----------------------------|----------------------------|--------------------------|--------------------------|---------------|--------------------------|-----------|
| Variety                    |                                             | DV92                       | TA2780                     | TA101132                 | Strong Field             | CDC commander | Chinese Spring           | AC Barrie |
| Abbreviated name           |                                             | DV                         | SP                         | TA                       | SF                       | CM            | CS                       | AC        |
| Genome                     |                                             | AA                         | BB                         | DD                       | AABB                     | AABB          | AABBDD                   | AABBDD    |
| Chromosome Number          |                                             | 14                         | 14                         | 14                       | 28                       | 28            | 42                       | 42        |
| Ploidy                     |                                             | Diploid                    | Diploid                    | Diploid                  | Tetraploid               | Tetraploid    | Hexaploid                | Hexaploid |
| Definition of stages       | hour (HAF) or day (DAF) after fertilization |                            |                            |                          |                          |               |                          |           |
| two cell embryo            | E01                                         | 24-30HAF                   | 24-30HAF                   | 24-30HAF                 | 24-36HAF                 | 24-36HAF      | 24-36HAF                 | 24-36HAF  |
| pre-embryo                 | E02                                         | 72-78HAF                   | 72-78HAF                   | 72-78HAF                 | 72-84 HAF                | 72-84 HAF     | 72-84HAF                 | 72-84HAF  |
| transition embryo          | E03                                         | 7DAF                       | 7DAF                       | 7DAF                     | 8DAF                     | 8DAF          | 9DAF                     | 9DAF      |
| leaf early embryo          | E04                                         | 10DAF                      | 10DAF                      | 10DAF                    | 11DAF                    | 11DAF         | 12DAF                    | 12DAF     |
| leaf middle embryo         | E05                                         | 15DAF                      | 15DAF                      | 15DAF                    | 16DAF                    | 16DAF         | 17DAF                    | 17DAF     |
| leaf late embryo           | E06                                         | 20DAF                      | 20DAF                      | 20DAF                    | 22DAF                    | 22DAF         | 24DAF                    | 24DAF     |
| mature embryo              | E07                                         | 26DAF                      | 26DAF                      | 26DAF                    | 31DAF                    | 31DAF         | 34DAF                    | 34DAF     |
| transition stage endosperm | E08                                         | 7DAF                       | 7DAF                       | 7DAF                     | 8DAF                     | 8DAF          | 9DAF                     | 9DAF      |
| leaf late stage endosperm  | E09                                         | 20DAF                      | 20DAF                      | 20DAF                    | 22DAF                    | 22DAF         | 24DAF                    | 24DAF     |
| leaf early stage pericarp  | E10                                         | 10DAF                      | 10DAF                      | 10DAF                    | 11DAF                    | 11DAF         | 12DAF                    | 12DAF     |

**Supplemental Table 1. Seven wheat cultivars and their putative diploid ancestors and sampling stages/tissues used in this study.** Genus names, selected varieties, ploidy information, abbreviations used in this study and sampling times are indicated.

|                     | gene loci | transcripts | multi-exon transcripts | multi-transcript loci | transcripts per locus |
|---------------------|-----------|-------------|------------------------|-----------------------|-----------------------|
| IWGSC RefSeq v2.0   | 113,001   | 138,666     | 104,387                | 16,789                | 1.2                   |
| Hexaploid (AC, CS)  | 103,309   | 223,873     | 194,562                | 44,205                | 2.2                   |
| Tetraploid (CM, ST) | 69,645    | 154,535     | 134,825                | 30,122                | 2.2                   |
| Diploid (DV)        | 34,804    | 75,691      | 65,911                 | 14,711                | 2.2                   |
| Diploid (SP)        | 34,841    | 78,844      | 68,914                 | 15,411                | 2.3                   |
| Diploid (TA)        | 33,664    | 69,338      | 59,737                 | 14,083                | 2.1                   |

**Supplemental Table 2. Transcript isoforms identified in this study.** The numbers of gene loci including multi-transcript loci and transcripts including multi-exon transcripts were shown. Average transcripts per locus were calculated.

| AS event(s) per gene | No. of AS genes | No. of AS events | % of AS genes |
|----------------------|-----------------|------------------|---------------|
| 1                    | 13,152          | 13,152           | 46.33         |
| 2                    | 5,766           | 11,532           | 20.31         |
| 3                    | 3,478           | 10,434           | 12.25         |
| 4                    | 1,970           | 7,880            | 6.94          |
| 5                    | 1,150           | 5,750            | 4.05          |
| 6                    | 807             | 4,842            | 2.84          |
| 7                    | 563             | 3,941            | 1.98          |
| 8                    | 360             | 2,880            | 1.27          |
| 9                    | 261             | 2,349            | 0.92          |
| 10                   | 198             | 1,980            | 0.70          |
| 11                   | 155             | 1,705            | 0.55          |
| 12                   | 142             | 1,704            | 0.50          |
| 13                   | 96              | 1,248            | 0.34          |
| 14                   | 77              | 1,078            | 0.27          |
| 15                   | 65              | 975              | 0.23          |
| 16                   | 41              | 656              | 0.14          |
| 17                   | 28              | 476              | 0.10          |
| 18                   | 29              | 522              | 0.10          |
| 19                   | 27              | 513              | 0.10          |
| 20                   | 24              | 480              | 0.08          |

**Supplemental Table 3. Statistical analysis of AS events in each gene locus across seven wheat cultivars and their putative diploid ancestors.** The distribution of AS events containing genes by their AS event numbers. Only AS events with  $5 < \text{PSI} < 95$  in at least one sample were counted.

| subgenomes  | PSI     |              |              |              | GE      |              |              |              |
|-------------|---------|--------------|--------------|--------------|---------|--------------|--------------|--------------|
|             | A       | B            | D            | AB           | A       | B            | D            | AB           |
| PCA figures | Fig. 3A | Sup. Fig. 4A | Sup. Fig. 4C | Sup. Fig. 4E | Fig. 3B | Sup. Fig. 4B | Sup. Fig. 4D | Sup. Fig. 4F |
| PC1         | 15.4%   | 28.2%        | 27.5%        | 13.2%        | 17.0%   | 16.5%        | 19.1%        | 19.9%        |
| PC2         | 9.6%    | 6.4%         | 8.4%         | 7.2%         | 13.4%   | 13.8%        | 14.1%        | 15.9%        |
| PC3         | 6.2%    | 5.0%         | 6.1%         | 4.4%         | 11.8%   | 12.0%        | 12.0%        | 13.1%        |
| PC4         | 3.5%    | 3.4%         | 4.5%         | 3.9%         | 10.5%   | 10.6%        | 10.4%        | 7.7%         |
| PC5         | 2.7%    | 3.0%         | 3.4%         | 3.3%         | 5.8%    | 5.8%         | 5.9%         | 7.0%         |
| PC6         | 2.4%    | 2.2%         | 2.9%         | 2.8%         | 5.6%    | 5.1%         | 4.6%         | 4.4%         |
| PC7         | 2.1%    | 1.9%         | 2.6%         | 2.7%         | 3.2%    | 3.5%         | 4.1%         | 3.4%         |
| PC8         | 1.9%    | 1.8%         | 2.4%         | 2.3%         | 2.9%    | 2.5%         | 3.7%         | 2.8%         |
| PC9         | 1.7%    | 1.6%         | 2.2%         | 2.1%         | 2.5%    | 2.2%         | 2.6%         | 2.5%         |
| PC10        | 1.7%    | 1.5%         | 2.1%         | 1.9%         | 2.2%    | 2.2%         | 2.4%         | 2.1%         |

**Supplemental Table 4. Portion of the variance (PoV) explained by each of the principal components in PCA from Figure 3 and Supplemental Figure 4.** PoV from PC1-PC10 was listed for each figure, the information about subgenomes, corresponding figures for both PSI and GE categories were provided.

| No.   | Orientation          | Target gene                                    | Sequence (5' to 3')                   |
|-------|----------------------|------------------------------------------------|---------------------------------------|
| DG322 | Forward primerF1     | MSTRG.214389,<br>MSTRG.231998,<br>MSTRG.249062 | AGGGATCAGATACCATCTCGAAC               |
| DG323 | Reverse primerR1     | MSTRG.214389,<br>MSTRG.231998,<br>MSTRG.249062 | ACCCACATTACTTCCATATAATTGC             |
| DG324 | Probe in A subgenome | MSTRG.214389/<br>TraesCS5A02G074900            | FAM-CCGTGTTACGCAGAACCTGCA-ZEN/IABkFQ  |
| DG325 | Probe in B subgenome | MSTRG.231998/<br>TraesCS5B02G081300            | HEX-CCGTGTGCACGCAGAACCTGCA-ZEN/IABkFQ |
| DG326 | Probe in C subgenome | MSTRG.249062/<br>TraesCS5D02G088400            | FAM-CCGTGTGCACACAGAACCTGCA-ZEN/IABkFQ |
| DG327 | Reverse primerR2     | MSTRG.214389,<br>MSTRG.231998,<br>MSTRG.249062 | TCTACATCTTCATCGACCTTCCAT              |
| DG363 | Probe in C subgenome | MSTRG.249062/<br>TraesCS5D02G088400            | HEX-CCGTGTGCACACAGAACCTGCA-ZEN/IABkFQ |

**Supplemental Table 5. Primers and probes used in this study.** The sequence of primers and probes, targeted genes and usages were indicated.

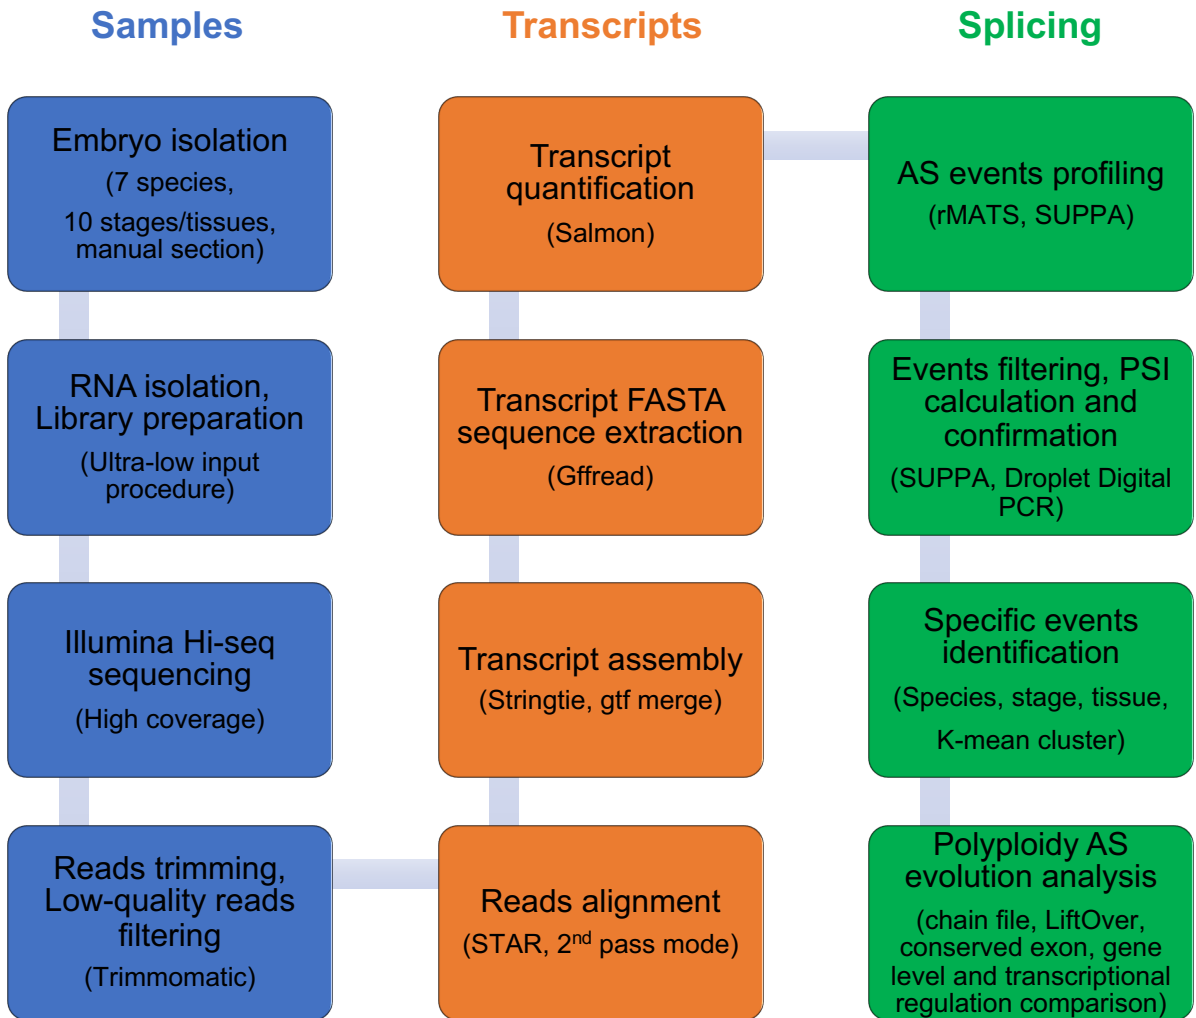

**Supplemental Figure 1 Pipeline of polyloid plants splicing evolution analysis using embryo samples as an example.** Three major steps focusing on analysis of samples, transcripts and splicing are labeled in different colors. Key words and major analysis tools are indicated in round brackets for each step.

| Event structure                                                                    | Event | Event description          | Ratio |
|------------------------------------------------------------------------------------|-------|----------------------------|-------|
| 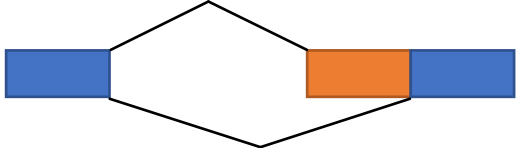   | A3    | Alternative 3' splice-site | 33%   |
|    | A5    | Alternative 5' splice-site | 19%   |
|    | RI    | Retained intron            | 16%   |
|    | SE    | Skipping exon              | 13%   |
|   | MX    | Mutually exclusive exons   | 0.6%  |
|  | AF    | Alternative first exon     | 13%   |
|  | AL    | Alternative last exon      | 5%    |

**Supplemental Figure 2 Statistics of AS events.** The intron-exon structure of the AS events are illustrated (exons are denoted by boxes and introns are thick black lines, AS regions are shown as orange or red boxes), followed by the event descriptions and the ratio of events (at least 5<PSI<95 in one sample) found in all samples in this study.

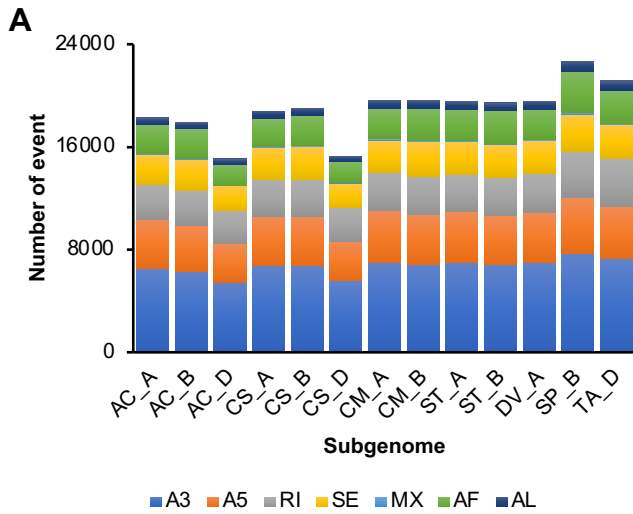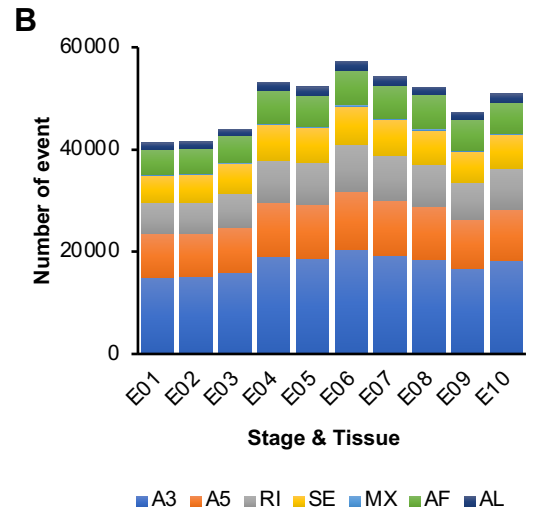

**Supplemental Figure 3 Statistics of AS events in subgenome, stage and tissue level. (A)** Distribution of seven types of AS events in different subgenomes. First two letters in X-axis indicate species, the third letter followed by underlines indicates subgenomes. E.g., AC\_A means A subgenome of AC Barrie. **(B)** Distribution of seven types of AS events in different stage and tissues.



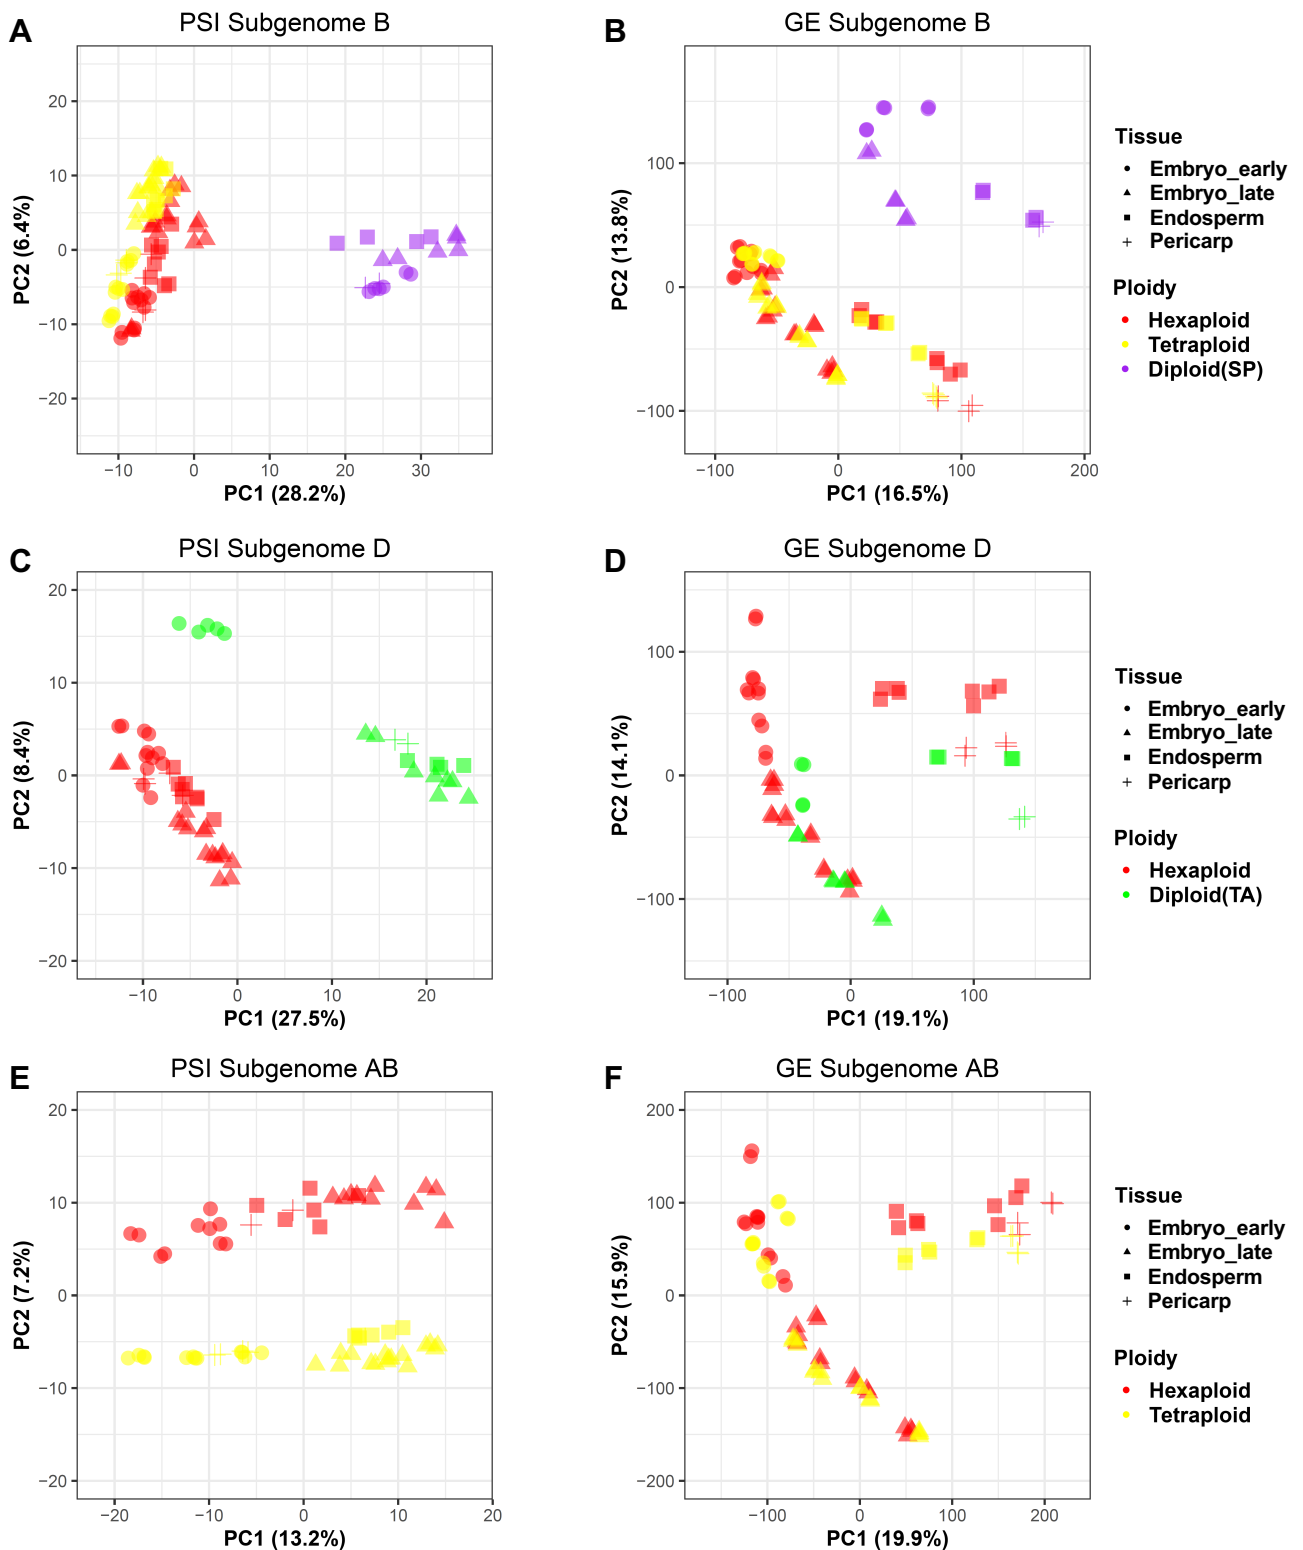

**Supplemental Figure 4 Principal component analysis (PCA) of gene and transcriptional level regulation in different species.** PCA based on PSI from different species in B subgenome (A), D subgenome (C) and both A and B subgenomes (E) were plotted on the left. PCA based on gene expression (GE) from different species in B subgenome (B), D subgenome (D) and both A and B subgenomes (F) were plotted on the right. X-axis and Y-axis indicate PC1 and PC2, respectively. Different stages and tissues are labeled with different shapes, different ploidies are labeled with different colors.

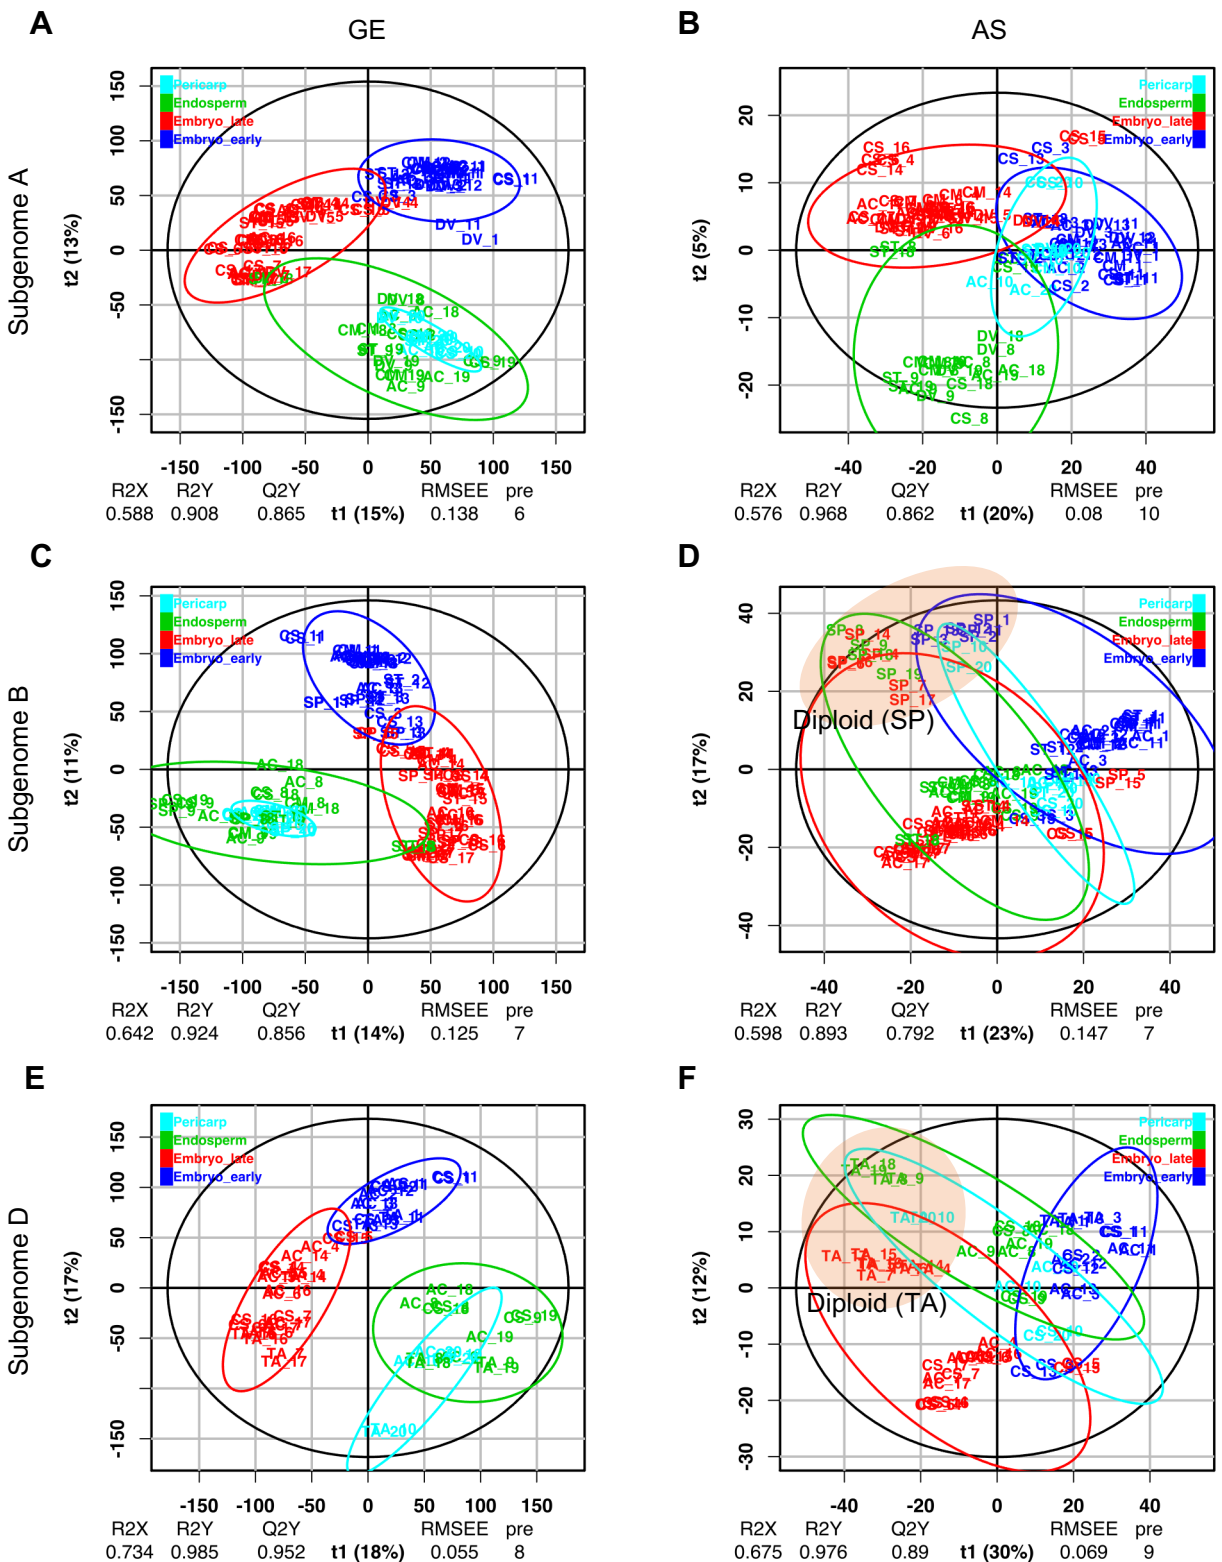

**Supplemental Figure 5 Regression analysis of AS and GE in polyploid wheat and diploid ancestral species from different stages and tissues during grain development using partial least squares discriminant analysis (PLS-DA). A-F.** PLS-DA of GE (A, C, E) and AS (B, D, F) by forcing the separation among different embryo developmental stages and other tissues in subgenome A (A, B), B (C, D) and D (E, F). Score plots of PLS-DA models used same samples for PCA plot in Figure 3 and Supplemental Figure 4. Samples from the same developmental stages and tissues used are labeled with same colors, as shown in the top left. Translucent ovals are used to group individuals in the same stages/tissues. Solid ovals in D and F are used to group the samples from diploid SP and TA, respectively.

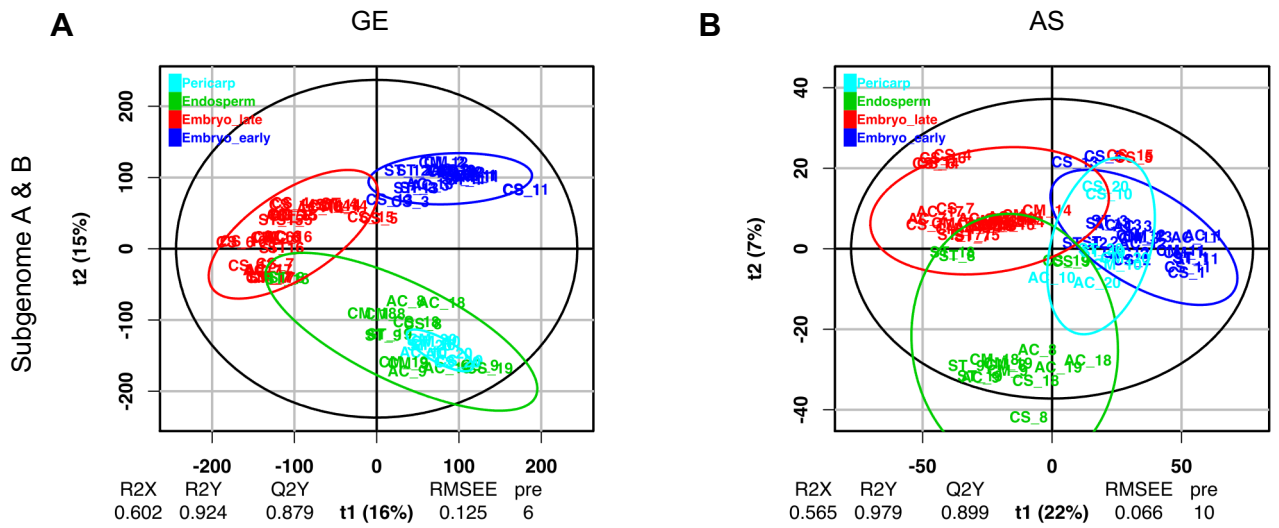

**Supplemental Figure 6 Regression analysis of AS and GE in hexaploid and tetraploid species from different stages and tissues during grain development using partial least squares discriminant analysis (PLS-DA). A-B.** PLS-DA of GE (A) and AS (B) by forcing the separation among different embryo developmental stages and other tissues. Score plots of PLS-DA models used same samples for PCA plot in Supplemental Figure 4E and F. Samples from the same developmental stages and tissues are labeled with same colors, as shown in the top left. Transparent ovals are used to group individuals in the same stages/tissues.

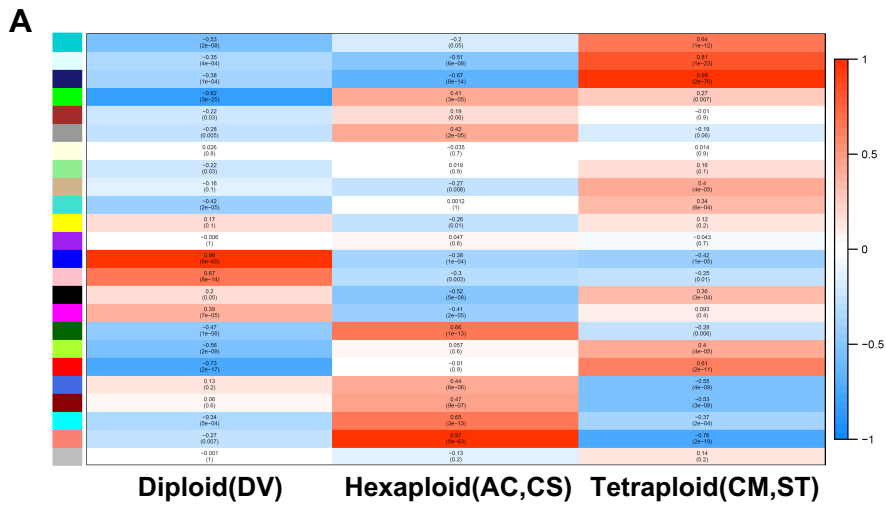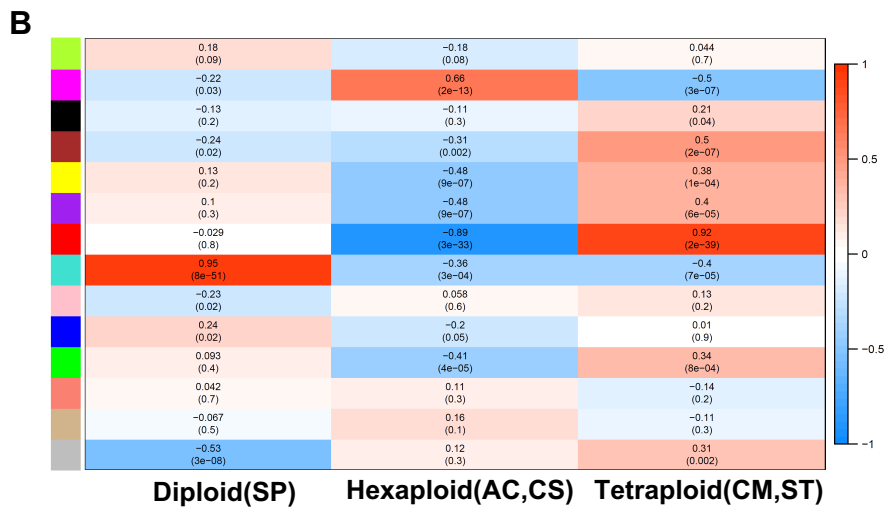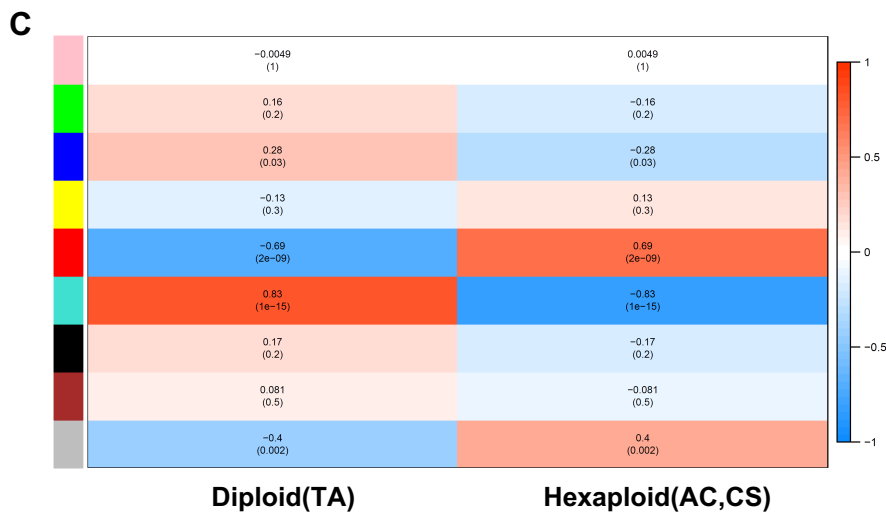

**Supplemental Figure 7 Heatmap of correlations between co-expressed AS clusters and ploidy levels.** **A.** AS in A subgenome; **B.** AS in B subgenome; **C.** AS in C subgenome. The color scheme, from red through white to green, indicates the levels of correlation, from high to low. The Pearson correlation value ( $r$ ) and  $p$ -values are indicated in boxes for each cluster. The ploidy-specific modules are identified by  $r > 0.8$ ,  $p$ -value  $< 0.001$ .

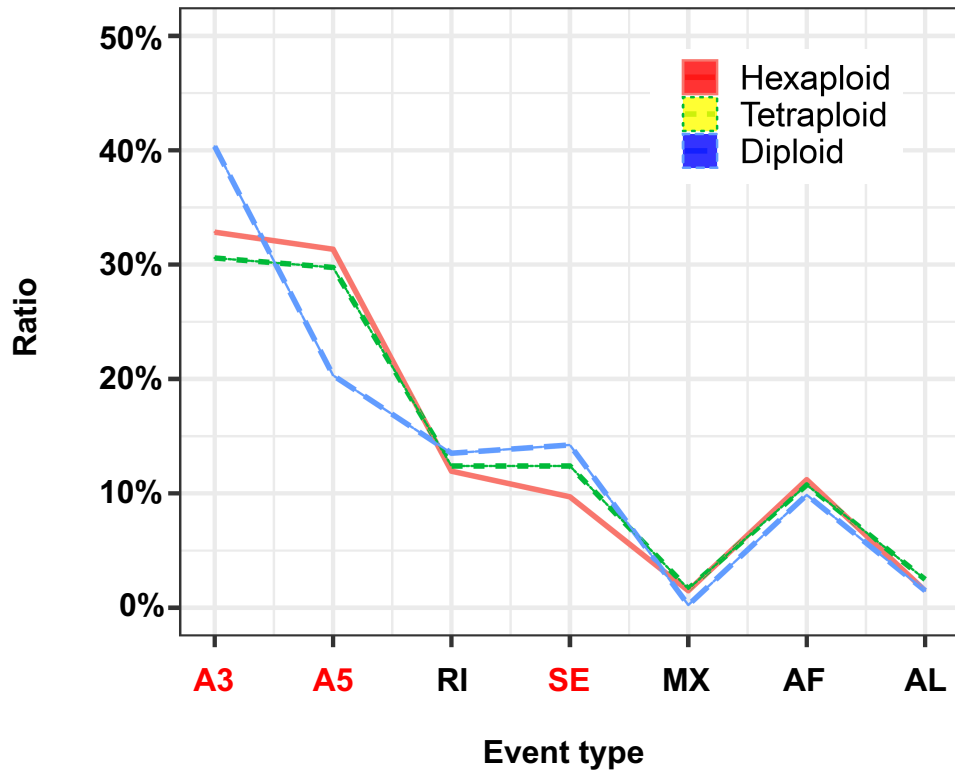

**Supplemental Figure 8 Distribution of AS types for ploidy-specific events.** X-axis, seven types of AS events, red color labels indicate significant difference among different ploidy-specific event clusters. Y-axis, event type ratios.

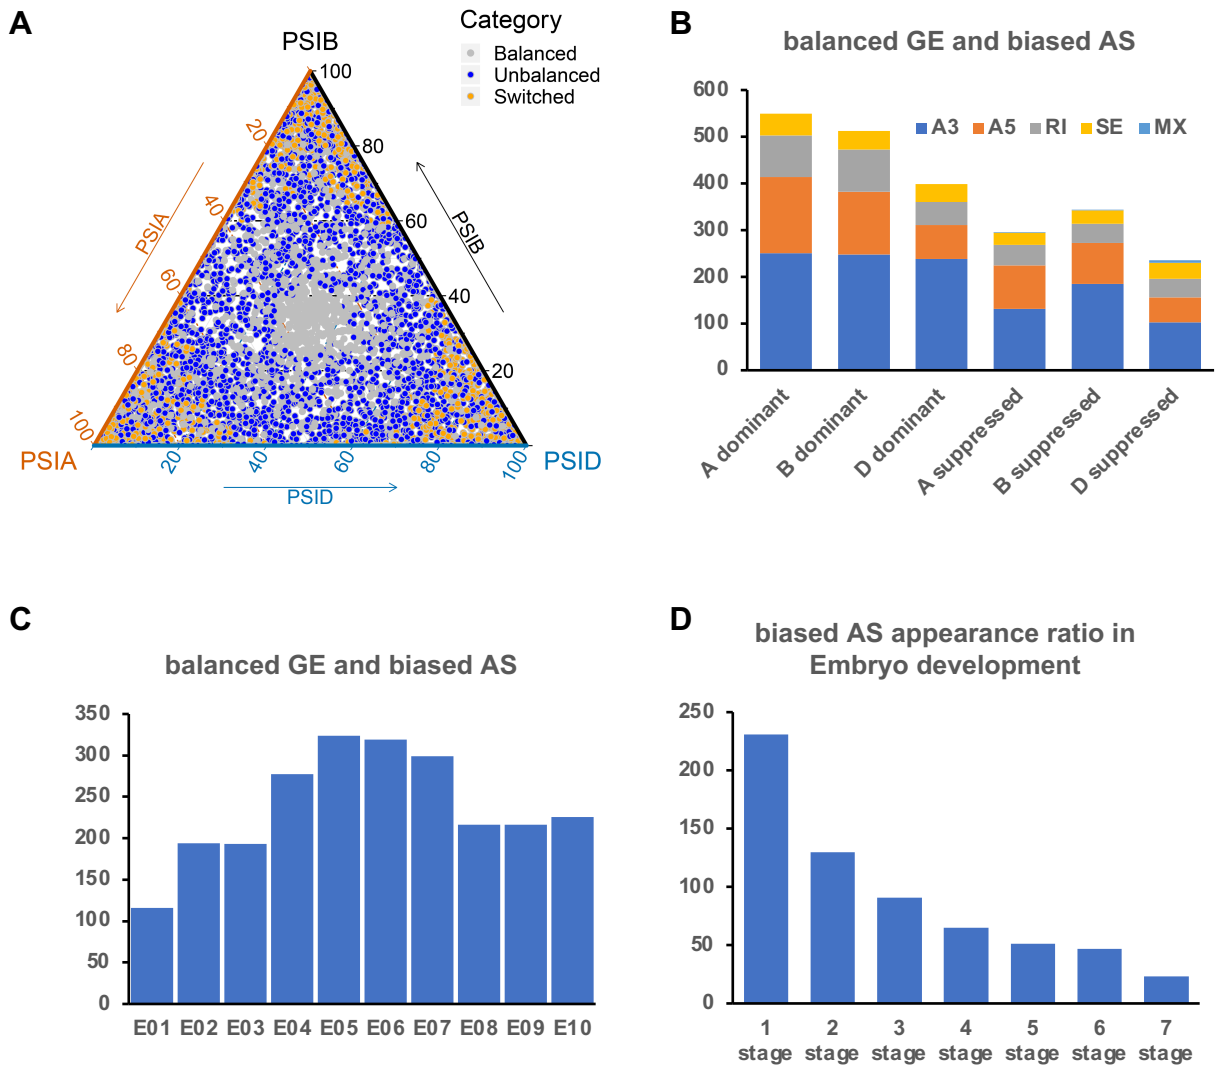

**Supplemental Figure 9 Characterization of AS triads with balanced gene level expression and unbalanced PSI ratio during embryogenesis. (A)** Ternplot of three categories AS events (Balanced, Unbalanced and Switched) in 1950 AS conserved triads (only AS events with TPM > 1 in all three members (A,B,D) of one triad were plotted). **(B)** Number of six categories of biased AS events with balanced gene level expression (GE) during embryogenesis. **(C)** Distribution of biased AS events with balanced GE in different stages and tissues. **(D)** Number of biased AS events with balanced GE appearing in multiple stages during embryogenesis.

**A**

GE: MSTRG.8151/MSTRG.22259/MSTRG.39371

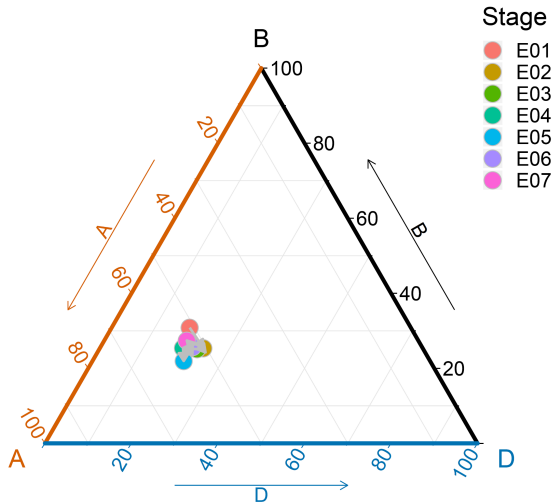**B**

AS: Event0617

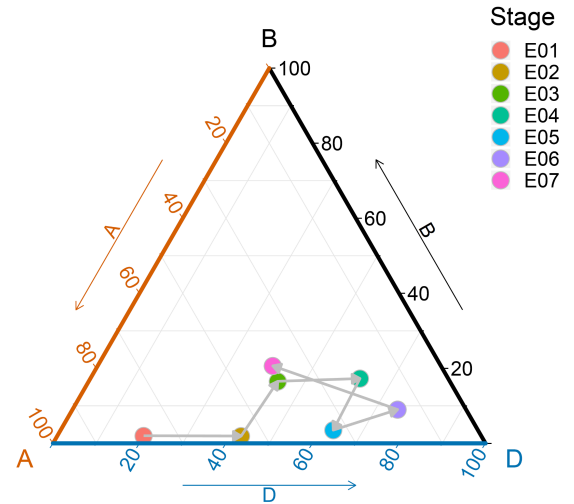**C**

GE: MSTRG.214389/MSTRG.231998/MSTRG.249062

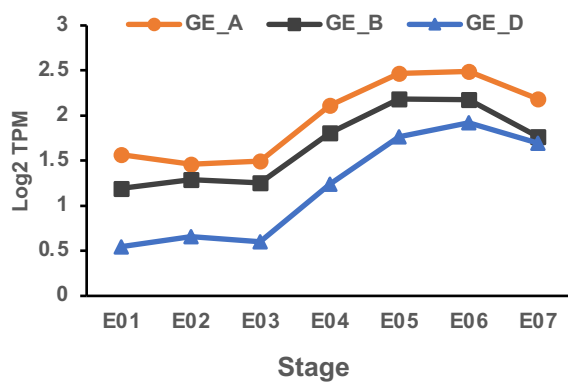**D**

AS: Event0691

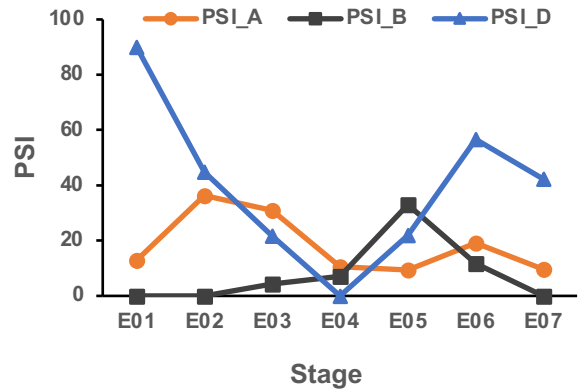**E**

GE: MSTRG.8151/MSTRG.22259/MSTRG.39371

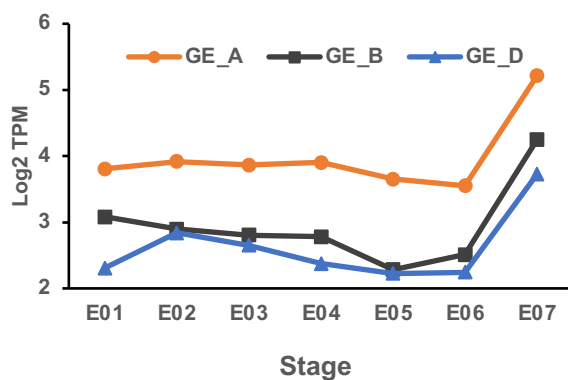**F**

AS: Event0617

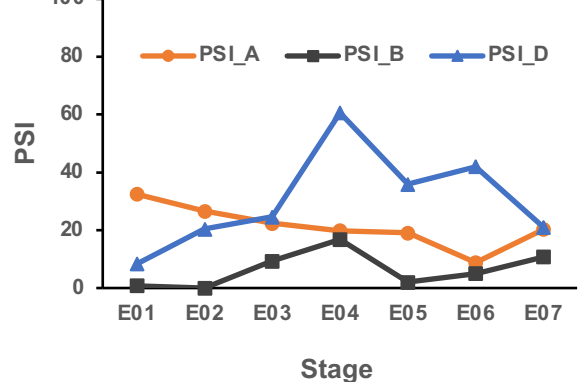

**Supplemental Figure 10 Examples of dynamic AS with stable GE during embryogenesis.** (A) Ternplot of gene expression ratio related to AS triad Event0617. (B) Ternplot of PSI ratio related to AS triad Event0617. The developmental process from E1 to E7 during embryogenesis was following the order labeled by arrows. (C) gene expression and (D) PSI trends related to AS triad Event0691 during embryogenesis. (E) gene expression and (F) PSI trends related to AS triad Event0617 during embryogenesis.

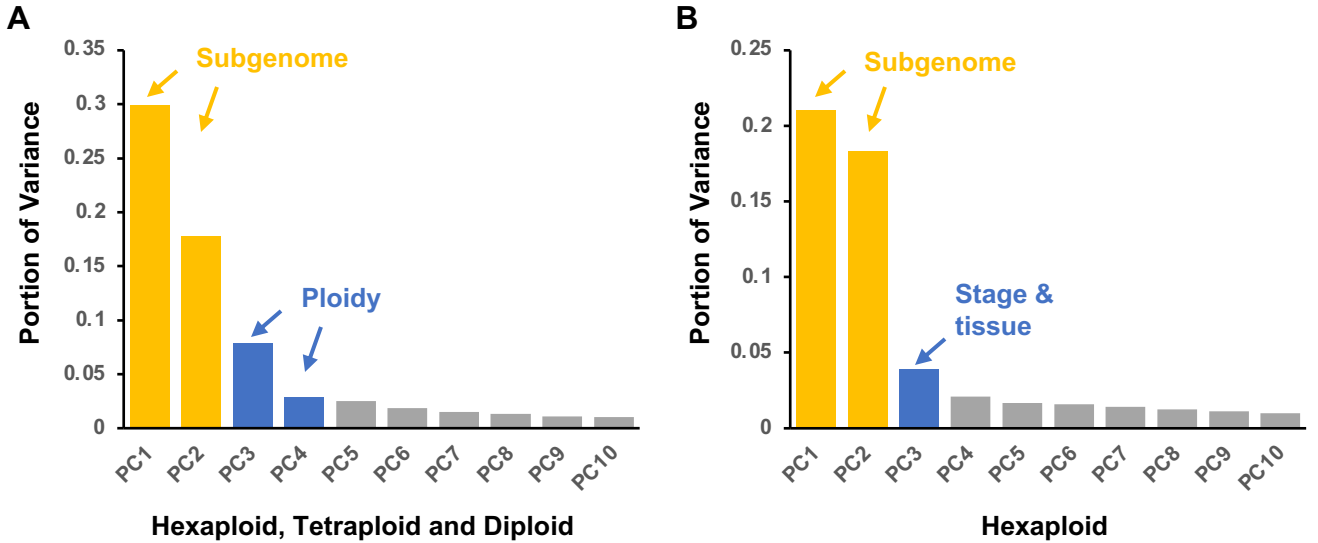

**Supplemental Figure 11 Portion of the variance (PoV) explained by each of the principal components in PCA based on conserved AS triads. (A)** Barplot of PoV from PCA using conserved triads in Hexaploid(AC, CS), Tetraploid (CM, ST) and Diploid (DV, SP, TA). The dominant effect (subgenome or ploidy) associated with the respective component are indicated in different colors. **(B)** Barplot of PoV from PCA using conserved triads in Hexaploid (AC, CS) only. The dominant effect (subgenome or stage/tissue) associated with the respective component are indicated in different colors.



**A**

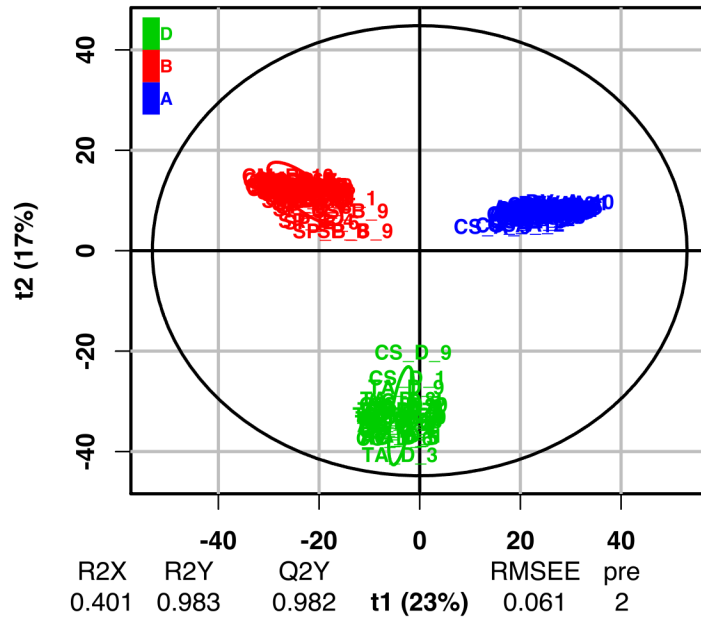

**B**

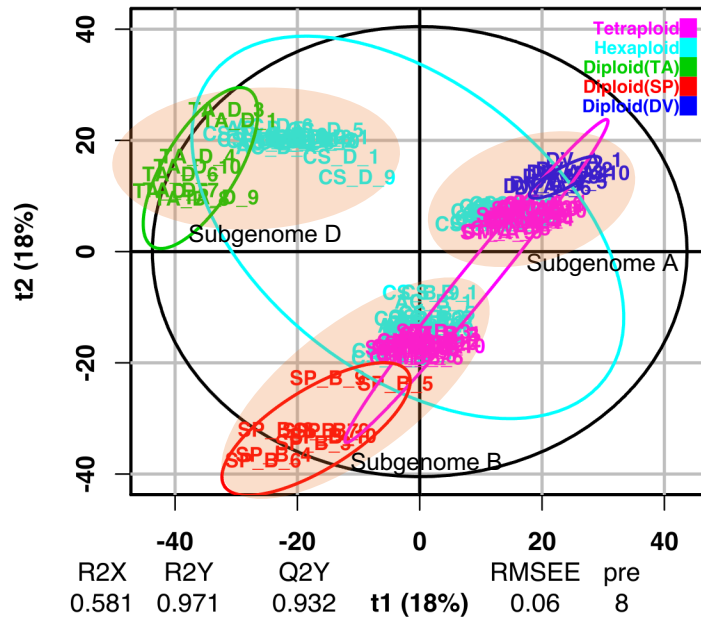

**Supplemental Figure 12 Regression analysis of AS in polyploid wheat and diploid ancestral species from different subgenomes and ploidies during grain development using partial least squares discriminant analysis (PLS-DA). A-B.** PLS-DA of AS by forcing the separation among different subgenomes (A) and different ploidies (B). Score plots of PLS-DA models used same samples for PCA plot in Figure 6. Samples from the same subgenomes (A) or the same ploidies (B) are labeled with same colors, as shown in the top left (A) or top right (B). Transparent ovals are used to group individuals in the same ploidies. Solid ovals are used to group the samples from the same subgenomes.

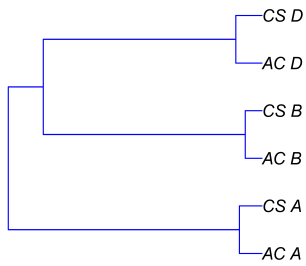

**E01**

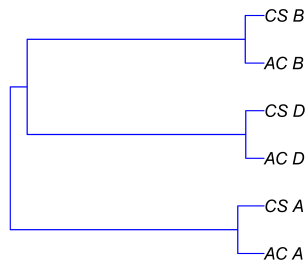

**E02**

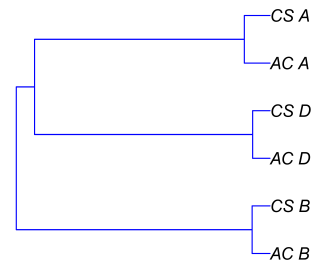

**E03**

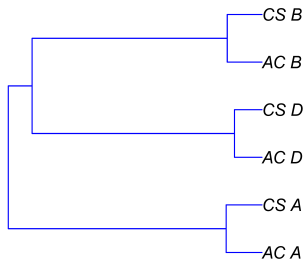

**E04**

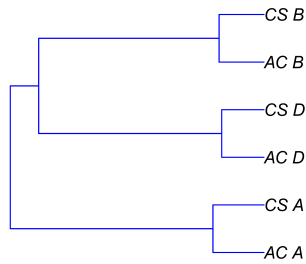

**E05**

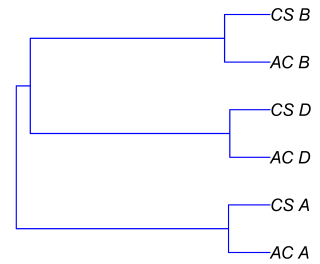

**E06**

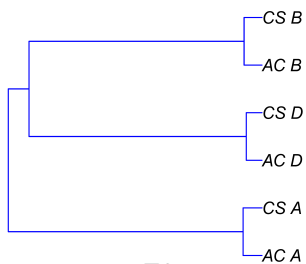

**E07**

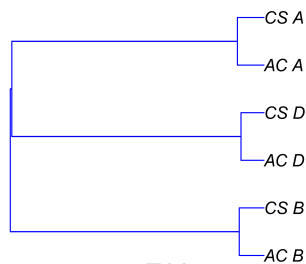

**E08**

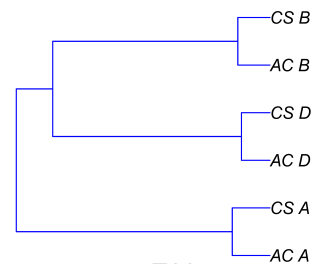

**E09**

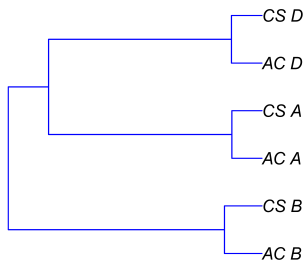

**E10**

**Supplemental Figure 13 Phylogenetic trees built using AS event triads in Hexaploid wheats during embryogenesis.** AS neighbor-joining trees based on conserved AS event triads were built with pairwise distance matrices (1 - Pearson correlation of PSI) for each stage/tissue from E01 - E10. For each pair of subgenomes, the PSIs of all AS event triads that are alternative are correlated.
